# Supplementary material
Source: PubMed Central journal article supplement (PMC2940517)
Supplement: en.2010-0252_1.pdf [file en.2010-0252_1.pdf]

1 **Table 1: Copper, iron, and zinc content of diets.**

| <b>Diet</b>                 | <b>Cu (<math>\mu\text{g/g}</math>)</b> | <b>Fe (<math>\mu\text{g/g}</math>)</b> | <b>Zn (<math>\mu\text{g/g}</math>)</b> |
|-----------------------------|----------------------------------------|----------------------------------------|----------------------------------------|
| <b>Control<br/>TD.08584</b> | 8.83 $\pm$ 0.96                        | 84.0 $\pm$ 2.01                        | 41.1 $\pm$ 0.19                        |
| <b>CuD<br/>TD.08585</b>     | 0.46 $\pm$ 0.03                        | 78.3 $\pm$ 1.50                        | 43.1 $\pm$ 0.68                        |
| <b>FeD<br/>TD.08586</b>     | 7.20 $\pm$ 0.60                        | 5.29 $\pm$ 0.12                        | 41.2 $\pm$ 1.57                        |

2

3 Metal content of diets was determined by wet ashing and flame AAS and represents the mean  $\pm$

4 SEM of 3 separate diet samples.

1 **Table 2: Diet Formulations**

| <b>Control Diet Formula (TD.08584)</b> | <b>g/kg</b> |
|----------------------------------------|-------------|
| Casein, low Cu & Fe                    | 200.0       |
| L-Cystine                              | 3.0         |
| Corn Starch <sup>2</sup>               | 390.6843    |
| Maltodextrin                           | 132.0       |
| Sucrose                                | 107.7       |
| Soybean Oil                            | 70.0        |
| Cellulose                              | 50.0        |
| Vitamin Mix, AIN-93-VX (94047)         | 10.0        |
| Choline Bitartate                      | 2.5         |
| TBHQ, antioxidant                      | 0.014       |
| Calcium Carbonate                      | 15.75       |
| Potassium Phosphate, monobasic         | 10.2        |
| Potassium Citrate, monohydrate         | 2.4773      |
| Sodium Chloride                        | 2.59        |
| Potassium Sulfate                      | 1.631       |
| Magnesium Oxide                        | 0.8505      |
| Zinc Carbonate                         | 0.0578      |
| Manganous Carbonate                    | 0.0221      |
| Potassium Iodate                       | 0.0004      |
| Sodium Selenate                        | 0.0004      |
| Ammonium Paramolybdate, tetrahydrate   | 0.0003      |

|                                           |        |
|-------------------------------------------|--------|
| Sodium Meta-Silicate, nonahydrate         | 0.0508 |
| Chromium Potassium Sulfate, dodecahydrate | 0.0096 |
| Lithium Chloride                          | 0.0006 |
| Boric Acid                                | 0.0029 |
| Sodium Fluoride                           | 0.0022 |
| Nickel Carbonate Hydroxide, tetrahydrate  | 0.0011 |
| Ammonium Meta-Vanadate                    | 0.0002 |
| Cupric Carbonate <sup>2</sup>             | 0.0145 |
| Ferric Citrate <sup>2</sup>               | 0.44   |

---

1

2 All diets contain 3.7 kcal/g (19% from protein, 63.7% from carbohydrate, 17.3% from fat). The  
3 Cu-deficient (CuD) and Fe-deficient (FeD) diet formulas are the same as the control diet except  
4 the CuD diet (TD.08585) does not contain cupric carbonate and the FeD diet (TD.08586) does  
5 not contain ferric citrate, with the amount of corn starch adjusted to account for the mass of  
6 cupric carbonate or ferric citrate removed.

1 **Table 3: qRT-PCR primer sequences**

| Gene          | PCR Primer Sequences                                                    | Position               | Product length (bp) |
|---------------|-------------------------------------------------------------------------|------------------------|---------------------|
| <i>Dio2</i>   | F: 5'-GAAGGACTACGCTGTGTCTGGAAC-3'<br>R: 5'-TCGCTGAACCAAAGTTGACCAC-3'    | 172-195<br>385-364     | 214                 |
| <i>Pvalb</i>  | F: 5'-AGCCTTTACTGCTGCAGACTCCTT-3'<br>R: 5'-AGCTCATCCTCCTCAATGAAGCCA-3'  | 51-74<br>191-168       | 141                 |
| <i>Mbp</i>    | F: 5'-GACTCACACACGAGAACT-3'<br>R: 5'-CCAGCTAAATCTGCTGAG-3'              | 405-422<br>608-590     | 204                 |
| <i>Mobp</i>   | F: 5'-TTCACCTTCCTCAACTCCAAGCGT-3'<br>R: 5'-TGCTCCTCCTTCTCAATCTGGTCT-3'  | 88-111<br>223-200      | 136                 |
| <i>Hr</i>     | F: 5'-TGGCCCTTGTAGGAAATGTCAGGA-3'<br>R: 5'-TTTCAGCTTGGTGTGATGGCTTGG-3'  | 1092-1115<br>1215-1192 | 124                 |
| <i>Rc3</i>    | F: 5'-TGCTCCAAGCCAGACGACGATATT-3'<br>R: 5'-GGCCACACTCTCCACTCTTTATCT-3'  | 25-48<br>157-134       | 133                 |
| <i>Fth1</i>   | F: 5'-TGATGTGGCCCTGAAGAACTTTGC-3'<br>R: 5'-AGTGCACACTCCATTGCATTGAGC-3'  | 135-158<br>314-291     | 180                 |
| <i>Cox IV</i> | F: 5'-GCACATGGGAGTGTGTTGTGAAGAGT-3'<br>R: 5'-TTTCTCATCCTGGAAAGGCTGCT-3' | 67-90<br>234-211       | 168                 |
| <i>Gapdh</i>  | F: 5'-TTCCTACCCCAATGTATCCG-3'<br>R: 5'-ACCACCCTGTTGCTGTAGCCA-3'         | 698-718<br>968-948     | 271                 |
| <i>Ftl</i>    | F: 5'-TTTGATCGGGATGACGTGGCTTTG-3'<br>R: 5'-ATGGCTTCTGCACATCCTGGAAGA-3'  | 112-135<br>256-233     | 145                 |

2

3 Genes: Type II deiodinase, *Dio2*; Parvalbumin, *Pvalb*; Myelin basic protein, *Mbp*; Myelin-  
 4 associated oligodendrocyte basic protein, *Mobp*; Hairless, *Hr*; Neurogranin, *Rc3*; Ferritin H,  
 5 *Fth1*; Cytochrome c oxidase subunit IV, *CoxIV*; Glyceraldehyde 3-phosphate dehydrogenase,  
 6 *Gapdh*; Ferritin L, *Ftl*. F = Forward, R = Reverse

7
